# Supplementary material
Source: publisher site journal article supplement (https://static.cambridge.org/content/id/urn:cambridge.org:id:article:S0266467420000127/resource/name/S0266467420000127supp001.docx)
Supplement: Supplementary file 1 [file S0266467420000127supp001.docx]

Table S1: Table showing the output results of Bayesian model for posterior probabilities of seed caching in different species. External effects are highlighted and significant effects (i.e. confidence intervals consistently lower or higher than 0) are shown in bold. E, FC and I refer to the forest edge, forest core and intermediate zones respectively

| Parameters | betas | Mean | Standard error(mean) | Standard deviation | Lcl (2.5%) | Lcl (25%) | Median (50%) | Ucl (75%) | Ucl (97.5%) | n_eff | Rhat |
| --- | --- | --- | --- | --- | --- | --- | --- | --- | --- | --- | --- |
| *Anthonotha*: E | beta[1] | -1.21 | 0.01 | 0.39 | -1.98 | -1.46 | -1.20 | -0.95 | -0.43 | 975.00 | 1.00 |
| *Beilschmedia*: E | beta[2] | -4.34 | 0.02 | 0.83 | -6.16 | -4.86 | -4.27 | -3.76 | -2.87 | 2000.00 | 1.00 |
| *Carapa*: E | beta[3] | -3.35 | 0.01 | 0.35 | -4.08 | -3.57 | -3.33 | -3.10 | -2.69 | 720.00 | 1.00 |
| *Santiria*: E | beta[4] | -3.38 | 0.01 | 0.39 | -4.18 | -3.63 | -3.37 | -3.10 | -2.68 | 803.00 | 1.00 |
| *Anthonotha*: FC | beta[5] | -2.66 | 0.01 | 0.44 | -3.53 | -2.96 | -2.66 | -2.35 | -1.84 | 947.00 | 1.01 |
| *Beilschmedia*: FC | beta[6] | -3.44 | 0.01 | 0.61 | -4.69 | -3.85 | -3.41 | -3.01 | -2.35 | 2000.00 | 1.01 |
| *Carapa*: FC | beta[7] | -5.00 | 0.02 | 0.49 | -6.04 | -5.31 | -4.97 | -4.65 | -4.12 | 1045.00 | 1.01 |
| *Santiria*: FC | beta[8] | -3.22 | 0.01 | 0.37 | -3.95 | -3.47 | -3.21 | -2.96 | -2.55 | 806.00 | 1.01 |
| *Anthonotha*: I | beta[9] | -2.94 | 0.01 | 0.49 | -3.90 | -3.26 | -2.94 | -2.61 | -1.99 | 1331.00 | 1.00 |
| *Beilschmedia*: I | beta[10] | -1.94 | 0.01 | 0.45 | -2.82 | -2.26 | -1.94 | -1.63 | -1.06 | 951.00 | 1.01 |
| *Carapa*: I | beta[11] | -3.88 | 0.01 | 0.36 | -4.64 | -4.10 | -3.87 | -3.64 | -3.20 | 777.00 | 1.01 |
| *Santiria*: I | beta[12] | -4.18 | 0.01 | 0.45 | -5.14 | -4.46 | -4.15 | -3.86 | -3.33 | 1056.00 | 1.01 |
| Litter cover | beta[13] | 0.02 | 0.00 | 0.17 | -0.32 | -0.10 | 0.01 | 0.13 | 0.35 | 1331.00 | 1.00 |
| Distance to water | beta[14] | 0.05 | 0.01 | 0.20 | -0.33 | -0.08 | 0.06 | 0.18 | 0.44 | 1002.00 | 1.00 |
| Dead logs | **beta[15]** | **0.31** | **0.01** | **0.15** | **0.03** | **0.21** | **0.30** | **0.40** | **0.61** | **660**.00 | **1.01** |
| F. abundance | **beta[16]** | **0.44** | **0.00** | **0.12** | **0.22** | **0.36** | **0.43** | **0.51** | **0.65** | **2000**.00 | **1.00** |
| Herb cover | beta[17] | -0.31 | 0.01 | 0.16 | -0.64 | -0.42 | -0.31 | -0.21 | 0.00 | 839.00 | 1.00 |

Table S2: Table showing the output results of Bayesian model for posterior probabilities of seed predation in different species. External effects are highlighted and significant effects (i.e. confidence intervals consistently lower or higher than 0) are shown in bold. E, FC and I refer to the forest edge, forest core and intermediate zones respectively

| Parameters | betas | Mean | Standard error(mean) | Standard deviation | Lcl (2.5%) | Lcl (25%) | Median (50%) | Ucl (75%) | Ucl (97.5%) | n_eff | Rhat |
| --- | --- | --- | --- | --- | --- | --- | --- | --- | --- | --- | --- |
| *Anthonotha*: E | beta[1] | -0.26 | 0.02 | 0.45 | -1.16 | -0.53 | -0.25 | 0.03 | 0.59 | 847.00 | 1.01 |
| *Beilschmedia*: E | beta[2] | -1.77 | 0.02 | 0.44 | -2.63 | -2.04 | -1.77 | -1.47 | -0.94 | 730.00 | 1.01 |
| *Carapa*: E | beta[3] | 2.29 | 0.02 | 0.42 | 1.48 | 2.03 | 2.29 | 2.54 | 3.12 | 744.00 | 1.01 |
| *Santiria*: E | beta[4] | 1.79 | 0.02 | 0.42 | 0.94 | 1.54 | 1.80 | 2.05 | 2.61 | 723.00 | 1.01 |
| *Anthonotha*: FC | beta[5] | 0.84 | 0.02 | 0.47 | -0.10 | 0.56 | 0.85 | 1.12 | 1.79 | 914.00 | 1.00 |
| *Beilschmedia*: FC | beta[6] | -0.11 | 0.02 | 0.47 | -1.03 | -0.40 | -0.10 | 0.18 | 0.84 | 780.00 | 1.00 |
| *Carapa*: FC | beta[7] | 2.86 | 0.02 | 0.42 | 2.04 | 2.60 | 2.85 | 3.12 | 3.70 | 729.00 | 1.01 |
| *Santiria*: FC | beta[8] | 1.38 | 0.02 | 0.41 | 0.57 | 1.13 | 1.38 | 1.61 | 2.22 | 721.00 | 1.01 |
| *Anthonotha*: I | beta[9] | 0.96 | 0.02 | 0.47 | 0.02 | 0.68 | 0.96 | 1.26 | 1.85 | 710.00 | 1.01 |
| *Beilschmedia*: I | beta[10] | -0.78 | 0.02 | 0.47 | -1.70 | -1.08 | -0.78 | -0.49 | 0.16 | 734.00 | 1.00 |
| *Carapa*: I | beta[11] | 2.45 | 0.02 | 0.40 | 1.62 | 2.21 | 2.46 | 2.71 | 3.23 | 652.00 | 1.01 |
| *Santiria*: I | beta[12] | 2.01 | 0.02 | 0.41 | 1.21 | 1.75 | 2.02 | 2.25 | 2.84 | 661.00 | 1.01 |
| Litter cover | beta[13] | -0.01 | 0.00 | 0.13 | -0.27 | -0.10 | -0.01 | 0.08 | 0.24 | 1521.00 | 1.00 |
| Distance to water | beta[14] | 0.02 | 0.00 | 0.15 | -0.26 | -0.08 | 0.02 | 0.12 | 0.31 | 1405.00 | 1.00 |
| Dead logs | beta[15] | 0.02 | 0.00 | 0.12 | -0.23 | -0.06 | 0.02 | 0.10 | 0.24 | 1377.00 | 1.00 |
| F. abundance | **beta[16]** | **-0.22** | **0.00** | **0.07** | **-0.36** | **-0.27** | **-0.22** | **-0.17** | **-0.08** | **2000.00** | **1.00** |
| Herb cover | beta[17] | 0.06 | 0.00 | 0.12 | -0.19 | -0.02 | 0.06 | 0.14 | 0.30 | 1293.00 | 1.00 |

Table S3: Table showing the output results of Bayesian model for posterior probabilities of seed caching in different fat content levels. External effects are highlighted and significant effects (i.e. confidence intervals consistently lower or higher than 0) are shown in bold. E, FC and I refer to the forest edge, forest core and intermediate zones respectively

| Parameters | betas | Mean | Standard error(mean) | Standard deviation | Lcl (2.5%) | Lcl (25%) | Median (50%) | Ucl (75%) | Ucl (97.5%) | n_eff | Rhat |
| --- | --- | --- | --- | --- | --- | --- | --- | --- | --- | --- | --- |
| high: E | beta[1] | -3.49 | 0.01 | 0.40 | -4.29 | -3.75 | -3.48 | -3.22 | -2.79 | 911.00 | 1.00 |
| low: E | beta[2] | -2.06 | 0.01 | 0.40 | -2.85 | -2.32 | -2.07 | -1.80 | -1.31 | 1049.00 | 1.00 |
| moderate: E | beta[3] | -3.66 | 0.01 | 0.44 | -4.56 | -3.94 | -3.64 | -3.37 | -2.87 | 878.00 | 1.00 |
| high: FC | beta[4] | -5.10 | 0.02 | 0.53 | -6.15 | -5.47 | -5.09 | -4.74 | -4.13 | 1160.00 | 1.00 |
| low: FC | beta[5] | -3.00 | 0.02 | 0.45 | -3.84 | -3.30 | -2.99 | -2.70 | -2.15 | 707.00 | 1.00 |
| moderate: FC | beta[6] | -3.35 | 0.02 | 0.42 | -4.17 | -3.62 | -3.34 | -3.07 | -2.59 | 767.00 | 1.00 |
| high: I | beta[7] | -4.03 | 0.01 | 0.40 | -4.83 | -4.28 | -4.02 | -3.77 | -3.27 | 890.00 | 1.00 |
| low: I | beta[8] | -2.47 | 0.01 | 0.42 | -3.28 | -2.76 | -2.48 | -2.19 | -1.68 | 1084.00 | 1.00 |
| moderate: I | beta[9] | -4.33 | 0.01 | 0.48 | -5.30 | -4.63 | -4.31 | -4.00 | -3.43 | 1118.00 | 1.00 |
| Litter cover | beta[10] | 0.00 | 0.00 | 0.18 | -0.35 | -0.12 | 0.00 | 0.12 | 0.37 | 1427.00 | 1.00 |
| Distance to water | beta[11] | 0.09 | 0.01 | 0.22 | -0.33 | -0.06 | 0.09 | 0.24 | 0.53 | 1265.00 | 1.00 |
| Dead logs | **beta[12]** | **0.37** | **0.00** | **0.15** | **0.09** | **0.27** | **0.37** | **0.47** | **0.66** | **1218.00** | **1.00** |
| F. abundance | **beta[13]** | **0.58** | **0.00** | **0.11** | **0.38** | **0.50** | **0.58** | **0.65** | **0.80** | **2000.00** | **1.00** |
| Herb cover | **beta[14]** | **-0.32** | **0.00** | **0.17** | **-0.68** | **-0.44** | **-0.32** | **-0.20** | **-0.01** | **1347.00** | **1.00** |

Table S4: Table showing the output results of Bayesian model for posterior probabilities of seed predation in different fat content levels. External effects are highlighted and significant effects (i.e. confidence intervals consistently lower or higher than 0) are shown in bold. E, FC and I refer to the forest edge, forest core and intermediate zones respectively

| Parameters | betas | Mean | Standard error(mean) | Standard deviation | Lcl (2.5%) | Lcl (25%) | Median (50%) | Ucl (75%) | Ucl (97.5%) | n_eff | Rhat |
| --- | --- | --- | --- | --- | --- | --- | --- | --- | --- | --- | --- |
| high: E | beta[1] | 2.37 | 0.02 | 0.43 | 1.50 | 2.09 | 2.37 | 2.63 | 3.22 | 325.00 | 1.01 |
| low: E | beta[2] | -1.01 | 0.02 | 0.43 | -1.87 | -1.29 | -1.01 | -0.74 | -0.16 | 347.00 | 1.01 |
| moderate: E | beta[3] | 1.72 | 0.02 | 0.43 | 0.84 | 1.45 | 1.71 | 2.00 | 2.58 | 326.00 | 1.01 |
| high: FC | beta[4] | 2.84 | 0.03 | 0.44 | 1.97 | 2.58 | 2.83 | 3.11 | 3.84 | 224.00 | 1.01 |
| low: FC | beta[5] | 0.37 | 0.03 | 0.45 | -0.55 | 0.10 | 0.37 | 0.65 | 1.30 | 241.00 | 1.01 |
| moderate: FC | beta[6] | 1.26 | 0.02 | 0.42 | 0.40 | 1.02 | 1.25 | 1.51 | 2.13 | 291.00 | 1.01 |
| high: I | beta[7] | 2.50 | 0.03 | 0.42 | 1.66 | 2.25 | 2.52 | 2.76 | 3.31 | 210.00 | 1.02 |
| low: I | beta[8] | 0.21 | 0.02 | 0.44 | -0.68 | -0.07 | 0.21 | 0.50 | 1.07 | 317.00 | 1.01 |
| moderate: I | beta[9] | 1.94 | 0.02 | 0.42 | 1.07 | 1.67 | 1.95 | 2.21 | 2.77 | 289.00 | 1.02 |
| Litter cover | beta[10] | -0.03 | 0.00 | 0.13 | -0.27 | -0.12 | -0.03 | 0.06 | 0.21 | 1002.00 | 1.00 |
| Distance to water | beta[11] | -0.03 | 0.00 | 0.15 | -0.31 | -0.12 | -0.03 | 0.07 | 0.27 | 867.00 | 1.00 |
| Dead logs | beta[12] | 0.04 | 0.00 | 0.10 | -0.16 | -0.03 | 0.03 | 0.10 | 0.23 | 990.00 | 1.00 |
| F. abundance | **beta[13]** | **-0.05** | **0.00** | **0.06** | **-0.17** | **-0.10** | **-0.05** | **-0.01** | **0.07** | **2000.00** | **1.00** |
| Herb cover | beta[14] | 0.06 | 0.00 | 0.12 | -0.17 | -0.02 | 0.05 | 0.13 | 0.28 | 917.00 | 1.00 |

Table S5: Table showing the output results of Bayesian model for posterior probabilities of seed caching in different protein content levels. External effects are highlighted and significant effects (i.e. confidence intervals consistently lower or higher than 0) are shown in bold. E, FC and I refer to the forest edge, forest core and intermediate zones respectively

| Parameters | betas | Mean | Standard error(mean) | Standard deviation | Lcl (2.5%) | Lcl (25%) | Median (50%) | Ucl (75%) | Ucl (97.5%) | n_eff | Rhat |
| --- | --- | --- | --- | --- | --- | --- | --- | --- | --- | --- | --- |
| high: E | beta[1] | -3.53 | 0.01 | 0.37 | -4.28 | -3.77 | -3.53 | -3.29 | -2.81 | 726.00 | 1.01 |
| low: E | beta[2] | -2.94 | 0.01 | 0.30 | -3.54 | -3.13 | -2.93 | -2.74 | -2.38 | 656.00 | 1.00 |
| high: FC | beta[3] | -3.28 | 0.01 | 0.38 | -4.05 | -3.52 | -3.28 | -3.04 | -2.55 | 738.00 | 1.00 |
| low: FC | beta[4] | -4.04 | 0.01 | 0.36 | -4.79 | -4.26 | -4.02 | -3.81 | -3.37 | 656.00 | 1.00 |
| high: I | beta[5] | -4.20 | 0.01 | 0.43 | -5.09 | -4.48 | -4.19 | -3.91 | -3.40 | 929.00 | 1.01 |
| low: I | beta[6] | -3.42 | 0.01 | 0.32 | -4.05 | -3.63 | -3.41 | -3.21 | -2.80 | 735.00 | 1.00 |
| Litter cover | beta[7] | 0.02 | 0.01 | 0.17 | -0.31 | -0.10 | 0.01 | 0.13 | 0.37 | 1041.00 | 1.00 |
| Distance to water | beta[8] | 0.08 | 0.01 | 0.19 | -0.31 | -0.05 | 0.08 | 0.21 | 0.47 | 636.00 | 1.00 |
| Dead logs | **beta[9]** | **0.32** | **0.00** | **0.14** | **0.06** | **0.23** | **0.32** | **0.42** | **0.59** | **962.00** | **1.00** |
| F. abundance | **beta[10]** | **0.55** | **0.00** | **0.09** | **0.35** | **0.48** | **0.55** | **0.61** | **0.73** | **2000.00** | **1.00** |
| Herb cover | beta[11] | -0.29 | 0.00 | 0.17 | -0.62 | -0.39 | -0.28 | -0.18 | 0.02 | 1113.00 | 1.00 |

Table S6: Table showing the output results of Bayesian model for posterior probabilities of seed predation in different protein content levels. External effects are highlighted and significant effects (i.e. confidence intervals consistently lower or higher than 0) are shown in bold. E, FC and I refer to the forest edge, forest core and intermediate zones respectively

| Parameters | betas | Mean | Standard error(mean) | Standard deviation | Lcl (2.5%) | Lcl (25%) | Median (50%) | Ucl (75%) | Ucl (97.5%) | n_eff | Rhat |
| --- | --- | --- | --- | --- | --- | --- | --- | --- | --- | --- | --- |
| high: E | beta[1] | 1.71 | 0.01 | 0.32 | 1.09 | 1.52 | 1.71 | 1.90 | 2.32 | 745.00 | 1.00 |
| low: E | beta[2] | 1.16 | 0.01 | 0.29 | 0.59 | 1.00 | 1.17 | 1.33 | 1.73 | 683.00 | 1.00 |
| high: FC | beta[3] | 1.22 | 0.01 | 0.32 | 0.64 | 1.03 | 1.21 | 1.41 | 1.86 | 751.00 | 1.00 |
| low: FC | beta[4] | 1.99 | 0.01 | 0.31 | 1.44 | 1.80 | 1.99 | 2.16 | 2.63 | 722.00 | 1.00 |
| high: I | beta[5] | 1.92 | 0.01 | 0.31 | 1.32 | 1.72 | 1.92 | 2.12 | 2.52 | 815.00 | 1.00 |
| low: I | beta[6] | 1.80 | 0.01 | 0.29 | 1.27 | 1.63 | 1.80 | 1.98 | 2.36 | 735.00 | 1.00 |
| Litter cover | beta[7] | -0.05 | 0.00 | 0.12 | -0.27 | -0.13 | -0.06 | 0.02 | 0.17 | 776.00 | 1.00 |
| Distance to water | beta[8] | -0.03 | 0.00 | 0.13 | -0.28 | -0.12 | -0.03 | 0.06 | 0.23 | 882.00 | 1.00 |
| Dead logs | beta[9] | 0.04 | 0.00 | 0.10 | -0.16 | -0.03 | 0.05 | 0.11 | 0.24 | 657.00 | 1.00 |
| F. abundance | **beta[10]** | **-0.14** | **0**.00 | **0.05** | **-0.24** | **-0.17** | **-0.14** | **-0.10** | **-0.03** | **2000.00** | **1**.00 |
| Herb cover | beta[11] | 0.05 | 0.00 | 0.11 | -0.17 | -0.02 | 0.06 | 0.13 | 0.28 | 1020.00 | 1.00 |

Table S7: Table showing the output results of Bayesian model for posterior probabilities of seed caching in different fibre content levels. External effects are highlighted and significant effects (i.e. confidence intervals consistently lower or higher than 0) are shown in bold. E, FC and I refer to the forest edge, forest core and intermediate zones respectively

| Parameters | betas | Mean | Standard error(mean) | Standard deviation | Lcl (2.5%) | Lcl (25%) | Median (50%) | Ucl (75%) | Ucl (97.5%) | n_eff | Rhat |
| --- | --- | --- | --- | --- | --- | --- | --- | --- | --- | --- | --- |
| high: E | beta[1] | -2.06 | 0.01 | 0.38 | -2.80 | -2.31 | -2.06 | -1.80 | -1.34 | 862.00 | 1.00 |
| low: E | beta[2] | -3.47 | 0.01 | 0.36 | -4.21 | -3.70 | -3.46 | -3.23 | -2.80 | 742.00 | 1.00 |
| moderate: E | beta[3] | -3.62 | 0.01 | 0.41 | -4.48 | -3.88 | -3.61 | -3.34 | -2.86 | 765.00 | 1.00 |
| high: FC | beta[4] | -3.02 | 0.02 | 0.41 | -3.85 | -3.29 | -3.02 | -2.74 | -2.19 | 670.00 | 1.00 |
| low: FC | beta[5] | -5.12 | 0.02 | 0.51 | -6.15 | -5.45 | -5.10 | -4.76 | -4.16 | 899.00 | 1.00 |
| moderate: FC | beta[6] | -3.36 | 0.01 | 0.39 | -4.14 | -3.60 | -3.34 | -3.10 | -2.61 | 756.00 | 1.00 |
| high: I | beta[7] | -2.49 | 0.01 | 0.40 | -3.32 | -2.74 | -2.50 | -2.24 | -1.71 | 971.00 | 1.00 |
| low: I | beta[8] | -4.02 | 0.01 | 0.38 | -4.80 | -4.27 | -4.01 | -3.75 | -3.33 | 861.00 | 1.01 |
| moderate: I | beta[9] | -4.33 | 0.01 | 0.47 | -5.33 | -4.63 | -4.30 | -4.00 | -3.46 | 1019.00 | 1.01 |
| Litter cover | beta[10] | 0.00 | 0.01 | 0.18 | -0.36 | -0.12 | 0.00 | 0.12 | 0.36 | 819.00 | 1.00 |
| Distance to water | beta[11] | 0.07 | 0.01 | 0.21 | -0.34 | -0.07 | 0.06 | 0.21 | 0.48 | 928.00 | 1.00 |
| Dead logs | **beta[12]** | **0.36** | **0.00** | **0.15** | **0.07** | **0.26** | **0.36** | **0.46** | **0.66** | **1058.00** | **1.00** |
| F. abundance | **beta[13]** | **0.57** | **0.00** | **0.11** | **0.36** | **0.49** | **0.56** | **0.64** | **0.78** | **2000.00** | **1.00** |
| Herb cover | **beta[14]** | **-0.33** | **0.01** | **0.17** | **-0.66** | **-0.44** | **-0.32** | **-0.21** | **-0.01** | **918.00** | **1.00** |

Table S8: Table showing the output results of Bayesian model for posterior probabilities of seed predation in different fibre content levels. External effects are highlighted and significant effects (i.e. confidence intervals consistently lower or higher than 0) are shown in bold. E, FC and I refer to the forest edge, forest core and intermediate zones respectively

| Parameters | betas | Mean | Standard error(mean) | Standard deviation | Lcl (2.5%) | Lcl (25%) | Median (50%) | Ucl (75%) | Ucl (97.5%) | n_eff | Rhat |
| --- | --- | --- | --- | --- | --- | --- | --- | --- | --- | --- | --- |
| high: E | beta[1] | -0.97 | 0.02 | 0.47 | -1.84 | -1.26 | -0.98 | -0.70 | 0.08 | 371.00 | 1.00 |
| low: E | beta[2] | 2.42 | 0.02 | 0.47 | 1.55 | 2.12 | 2.40 | 2.68 | 3.41 | 359.00 | 1.01 |
| moderate: E | beta[3] | 1.77 | 0.03 | 0.47 | 0.90 | 1.47 | 1.76 | 2.04 | 2.83 | 346.00 | 1.01 |
| high: FC | beta[4] | 0.43 | 0.03 | 0.48 | -0.45 | 0.12 | 0.41 | 0.71 | 1.43 | 343.00 | 1.01 |
| low: FC | beta[5] | 2.90 | 0.03 | 0.48 | 2.04 | 2.60 | 2.88 | 3.17 | 3.97 | 334.00 | 1.01 |
| moderate: FC | beta[6] | 1.31 | 0.03 | 0.46 | 0.48 | 1.02 | 1.28 | 1.56 | 2.27 | 314.00 | 1.01 |
| high: I | beta[7] | 0.27 | 0.03 | 0.47 | -0.60 | -0.03 | 0.25 | 0.54 | 1.24 | 342.00 | 1.01 |
| low: I | beta[8] | 2.56 | 0.03 | 0.45 | 1.73 | 2.28 | 2.54 | 2.82 | 3.51 | 327.00 | 1.01 |
| moderate: I | beta[9] | 2.00 | 0.02 | 0.46 | 1.17 | 1.71 | 1.97 | 2.26 | 2.98 | 352.00 | 1.01 |
| Litter cover | beta[10] | -0.02 | 0.00 | 0.12 | -0.25 | -0.10 | -0.02 | 0.06 | 0.21 | 1133.00 | 1.00 |
| Distance to water | beta[11] | -0.03 | 0.00 | 0.14 | -0.30 | -0.12 | -0.03 | 0.07 | 0.25 | 941.00 | 1.00 |
| Dead logs | beta[12] | 0.04 | 0.00 | 0.11 | -0.17 | -0.03 | 0.04 | 0.12 | 0.25 | 1153.00 | 1.00 |
| F. abundance | beta[13] | -0.05 | 0.00 | 0.06 | -0.18 | -0.10 | -0.05 | -0.01 | 0.07 | 2000.00 | 1.00 |
| Herb cover | beta[14] | 0.06 | 0.00 | 0.12 | -0.16 | -0.02 | 0.06 | 0.14 | 0.28 | 1047.00 | 1.00 |

Table S9: Table showing the output results of Bayesian model for posterior probabilities of seed caching in different carbohydrate content levels. External effects are highlighted and significant effects (i.e. confidence intervals consistently lower or higher than 0) are shown in bold. E, FC and I refer to the forest edge, forest core and intermediate zones respectively.

| Parameters | betas | Mean | Standard error(mean) | Standard deviation | Lcl (2.5%) | Lcl (25%) | Median (50%) | Ucl (75%) | Ucl (97.5%) | n_eff | Rhat |
| --- | --- | --- | --- | --- | --- | --- | --- | --- | --- | --- | --- |
| high: E | beta[1] | -3.51 | 0.01 | 0.33 | -4.20 | -3.73 | -3.50 | -3.29 | -2.87 | 695.00 | 1.00 |
| low: E | beta[2] | -2.05 | 0.01 | 0.37 | -2.76 | -2.28 | -2.06 | -1.81 | -1.32 | 838.00 | 1.00 |
| high: FC | beta[3] | -4.08 | 0.01 | 0.38 | -4.88 | -4.33 | -4.07 | -3.83 | -3.36 | 702.00 | 1.01 |
| low: FC | beta[4] | -2.95 | 0.02 | 0.43 | -3.83 | -3.23 | -2.93 | -2.67 | -2.14 | 639.00 | 1.01 |
| high: I | beta[5] | -4.10 | 0.01 | 0.36 | -4.82 | -4.32 | -4.09 | -3.85 | -3.42 | 671.00 | 1.01 |
| low: I | beta[6] | -2.51 | 0.02 | 0.40 | -3.32 | -2.77 | -2.50 | -2.24 | -1.74 | 631.00 | 1.00 |
| Litter cover | beta[7] | 0.00 | 0.01 | 0.19 | -0.38 | -0.12 | 0.00 | 0.12 | 0.37 | 946.00 | 1.00 |
| Distance to water | beta[8] | 0.06 | 0.01 | 0.20 | -0.34 | -0.07 | 0.06 | 0.19 | 0.45 | 748.00 | 1.00 |
| Dead logs | **beta[9]** | **0.35** | **0.01** | **0.15** | **0.04** | **0.25** | **0.35** | **0.45** | **0.65** | **904.00** | **1.00** |
| F. abundance | **beta[10]** | **0.56** | **0.00** | **0.10** | **0.36** | **0.50** | **0.56** | **0.63** | **0.76** | **2000.00** | **1.00** |
| Herb cover | beta[11] | -0.32 | 0.01 | 0.17 | -0.66 | -0.44 | -0.32 | -0.21 | 0.01 | 646.00 | 1.01 |

Table S10: Table showing the output results of Bayesian model for posterior probabilities of seed predation in different carbohydrate content levels. External effects are highlighted and significant effects (i.e. confidence intervals consistently lower or higher than 0) are shown in bold. . E, FC and I refer to the forest edge, forest core and intermediate zones respectively.

| Parameters | betas | Mean | Standard error(mean) | Standard deviation | Lcl (2.5%) | Lcl (25%) | Median (50%) | Ucl (75%) | Ucl (97.5%) | n_eff | Rhat |
| --- | --- | --- | --- | --- | --- | --- | --- | --- | --- | --- | --- |
| high: E | beta[1] | 2.14 | 0.02 | 0.46 | 1.24 | 1.86 | 2.13 | 2.42 | 3.15 | 345.00 | 1.01 |
| low: E | beta[2] | -1.01 | 0.03 | 0.49 | -1.97 | -1.31 | -1.01 | -0.71 | 0.02 | 345.00 | 1.01 |
| high: FC | beta[3] | 2.16 | 0.02 | 0.46 | 1.26 | 1.87 | 2.14 | 2.42 | 3.18 | 421.00 | 1.01 |
| low: FC | beta[4] | 0.39 | 0.02 | 0.48 | -0.58 | 0.12 | 0.39 | 0.67 | 1.40 | 430.00 | 1.01 |
| high: I | beta[5] | 2.31 | 0.02 | 0.45 | 1.45 | 2.04 | 2.30 | 2.56 | 3.31 | 420.00 | 1.01 |
| low: I | beta[6] | 0.22 | 0.02 | 0.48 | -0.70 | -0.07 | 0.22 | 0.50 | 1.22 | 403.00 | 1.01 |
| Litter cover | beta[7] | -0.03 | 0.00 | 0.12 | -0.26 | -0.11 | -0.03 | 0.05 | 0.20 | 1158.00 | 1.00 |
| Distance to water | beta[8] | -0.01 | 0.00 | 0.14 | -0.31 | -0.11 | -0.01 | 0.08 | 0.26 | 1044.00 | 1.00 |
| Dead logs | beta[9] | 0.04 | 0.00 | 0.10 | -0.17 | -0.03 | 0.04 | 0.11 | 0.24 | 1321.00 | 1.00 |
| F. abundance | **beta[10]** | **-0.21** | **0.00** | **0.06** | **-0.32** | **-0.25** | **-0.21** | **-0.17** | **-0.11** | **2000.00** | **1.00** |
| Herb cover | beta[11] | 0.06 | 0.00 | 0.12 | -0.16 | -0.02 | 0.06 | 0.14 | 0.31 | 997.00 | 1.00 |
